# Supplementary material
Source: Springer Nature journal article supplement (https://www.springermedizin.de/resource/supplementary/13054_2013_3030_MOESM7_ESM.pdf/9712434)

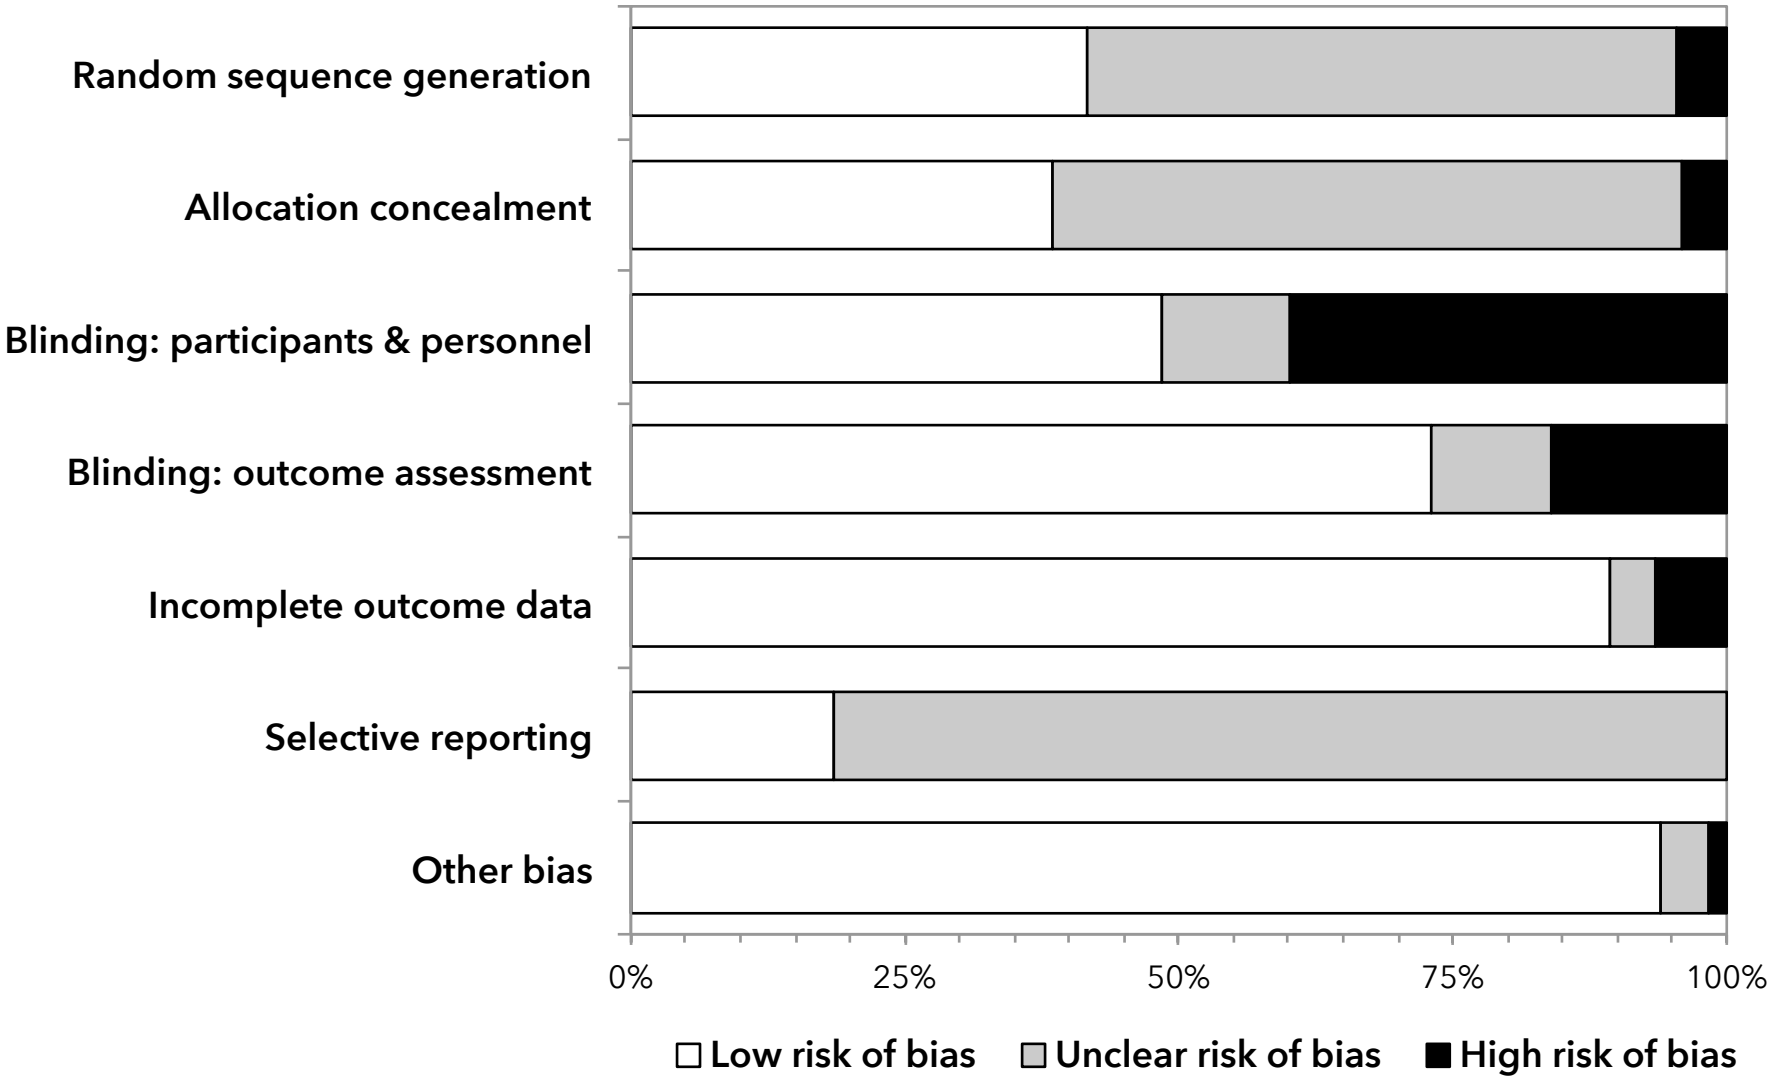

Supplement: MOESM7 [file 9712434]
